# Supplementary material for: Synthesis of TiO2-(B) Nanobelts for Acetone Sensing
Source: MDPI journal article supplement (doi:10.3390/s23198322), 2023-10-08
Supplement: s1 [file s1]

## Synthesis of TiO<sub>2</sub>-(B) Nanobelts for Acetone Sensing

Gayan W. C. Kumarage<sup>1,2</sup>, Shasika A. Panamaldeniya<sup>3,4</sup>, Dileepa C. Maddumage<sup>3,4</sup>, Abderrahim Moumen<sup>1</sup>, Valentin A. Maraloiu<sup>5</sup>, Catalina G. Mihalcea<sup>5</sup>, Raluca F. Negrea<sup>5</sup>, Buddhika S. Dassanayake<sup>4</sup>, Nanda Gunawardhana<sup>6</sup>, Dario Zappa<sup>1</sup>, Vardan Galstyan<sup>1</sup> and Elisabetta Comini<sup>1,\*</sup>

<sup>1</sup>SENSOR Lab, Department of Information Engineering, University of Brescia, 25133 Brescia, Italy

<sup>2</sup>Department of Physics and Electronics, Faculty of Science, University of Kelaniya, Kelaniya 11600, Sri Lanka

<sup>3</sup>Postgraduate Institute of Science, University of Peradeniya, Peradeniya 20400, Sri Lanka

<sup>4</sup>Department of Physics, Faculty of Science, University of Peradeniya, Peradeniya 20400, Sri Lanka

<sup>5</sup>Laboratory of Atomic Structures and Defects in Advanced Materials, National Institute of Materials Physics, Atomistilor str. 405 A, 077125 Magurele, Romania

<sup>6</sup>Research and International Affairs, Sri Lanka Technological Campus, Padukka 10500, Sri Lanka

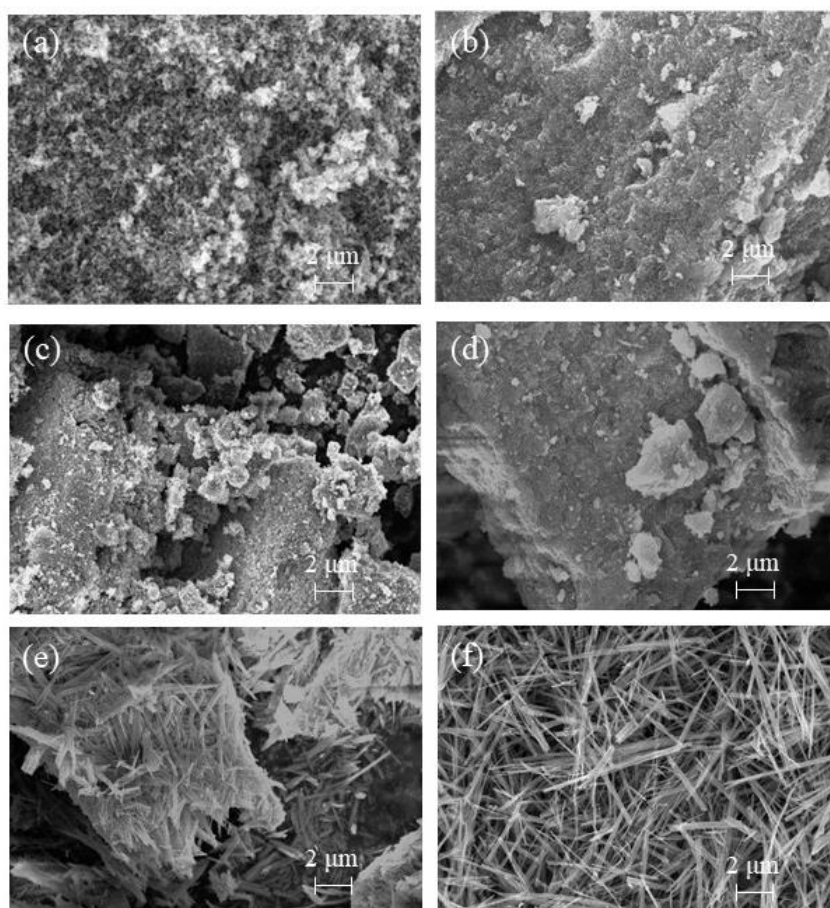

Figure S1. FE-SEM images of the obtained morphology at (a) starting anatase TiO<sub>2</sub> powder, (b) hydrothermal treatment at 120 °C, (c) hydrothermal treatment at 135 °C, (d) hydrothermal treatment at 125 °C, (e) hydrothermal treatment at 175 °C, (f) hydrothermal treatment at 200 °C.

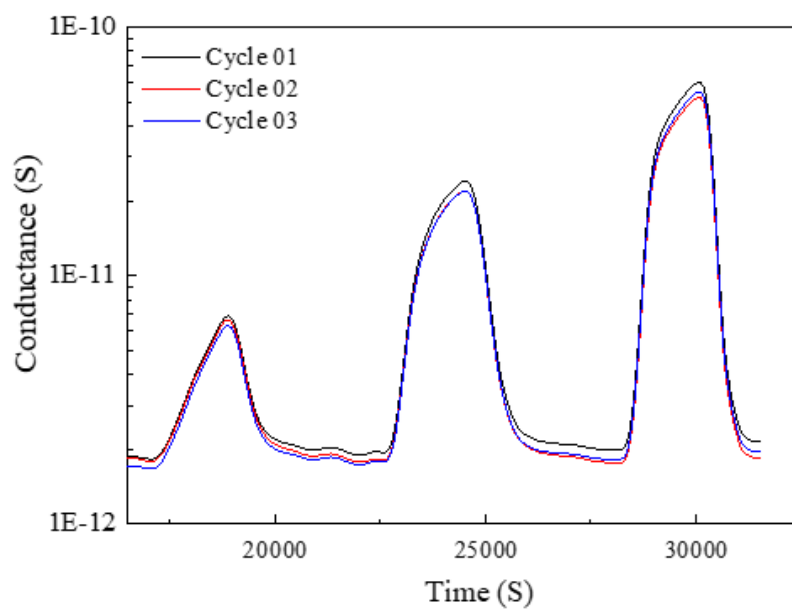

Figure S2. Reproducibility study of  $\text{TiO}_2\text{-B}$  nanobelts sensor toward 50 ppm  $\text{C}_3\text{H}_6\text{O}$  at 150 °C at 40 RH%.

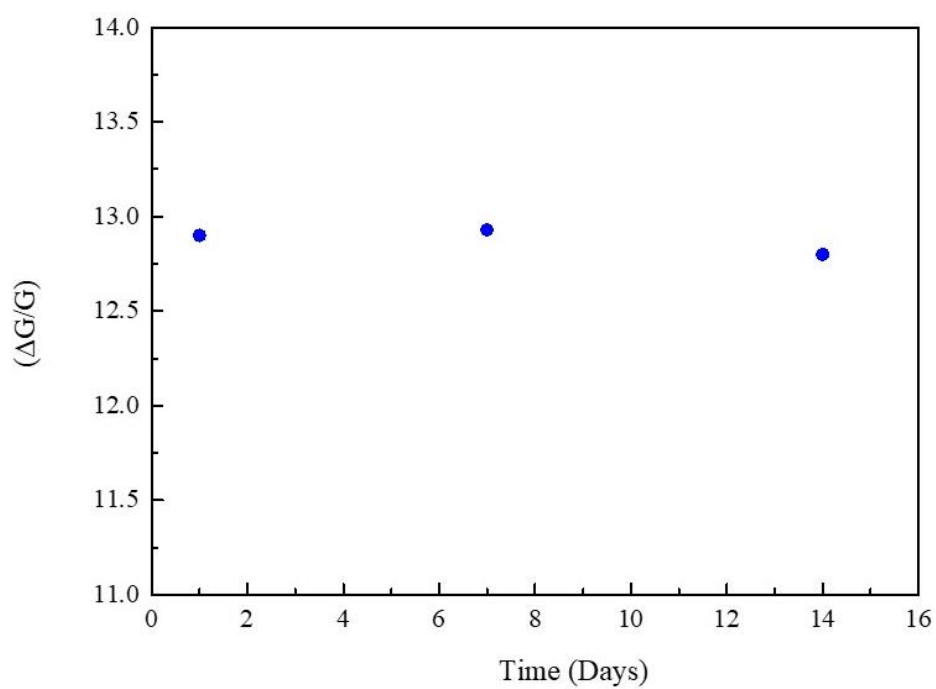

Figure S3. Stability study of  $\text{TiO}_2\text{-B}$  nanobelts sensor toward 50 ppm  $\text{C}_3\text{H}_6\text{O}$  at 150 °C in 40 RH% air for a tested two-week period.

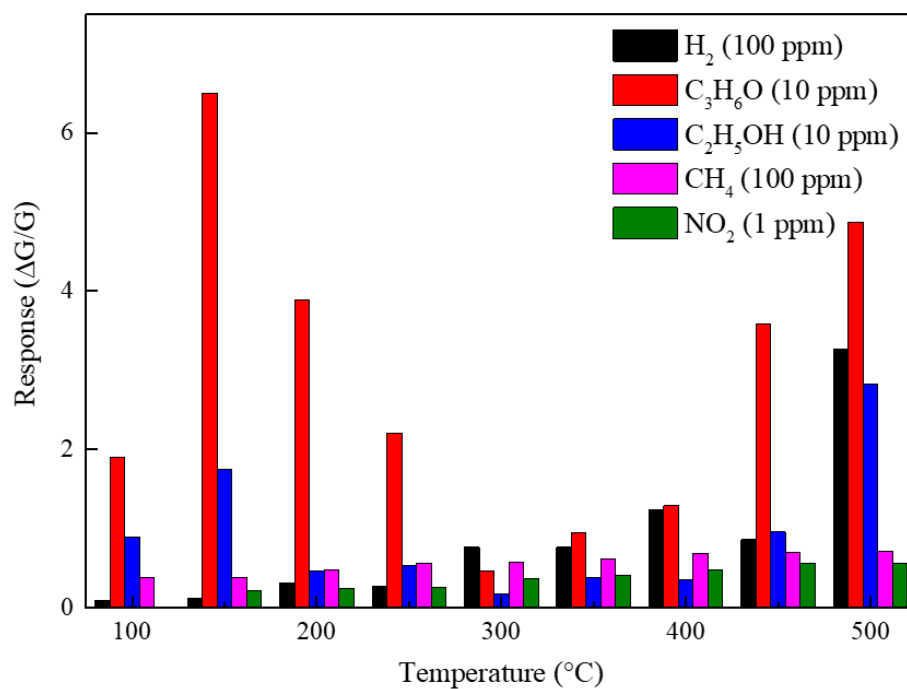

Figure S4. Response values of the sensor towards 500, 100, 10, 10, and 10 ppm of  $\text{CH}_4$ ,  $\text{H}_2$ ,  $\text{NO}_2$ ,  $\text{C}_2\text{H}_5\text{OH}$ , and  $\text{C}_3\text{H}_5\text{OH}$ .
